# Supplementary material
Source: PubMed Central journal article supplement (PMC5127723)
Supplement: NIHMS815432-supplement-2.pdf [file NIHMS815432-supplement-2.pdf]

| Session ID | # cells | 6-0 accuracy / # trials | 5-1 accuracy / # trials | 4-2 accuracy / # trials | 3-3 accuracy / # trials | GCaMP Variant |
|------------|---------|-------------------------|-------------------------|-------------------------|-------------------------|---------------|
| 131_140911 | 194     | 100% / 107              | 91.1% / 90              | 82.4% / 34              | N/A / 0                 | f             |
| 131_140916 | 188     | 94.7% / 94              | 85.7% / 105             | 81.8% / 33              | N/A / 0                 | f             |
| 136_140820 | 270     | 93.1% / 87              | 89.8% / 79              | 66.0% / 47              | N/A / 0                 | f             |
| 142_141212 | 434     | 90.0% / 181             | 85.0% / 181             | 76.9% / 52              | N/A / 0                 | m             |
| 142_141218 | 381     | 89.6% / 135             | 81.7% / 120             | 67.5% / 40              | N/A / 0                 | m             |
| 142_150103 | 215     | 90.7% / 86              | 83% / 94                | 74.3% / 105             | 60.5% / 38              | m             |
| 144_141203 | 648     | 87.8% / 106             | 79.5% / 146             | 73.8% / 42              | N/A / 0                 | m             |
| 144_141204 | 585     | 88.6% / 140             | 82.6% / 155             | 66.7% / 72              | N/A / 0                 | m             |
| 144_141228 | 330     | 80.9% / 173             | 77.9% / 163             | 77.6% / 49              | N/A / 0                 | m             |
| 150_141128 | 323     | 100% / 114              | 88.3% / 102             | 73.1% / 108             | 41.7% / 12              | f             |
| 150_141207 | 313     | 98.1% / 107             | 82.2% / 107             | 78.4% / 116             | 57.1% / 49              | f             |

**Supplementary Table 1**

**Summary of datasets analyzed.**
